# Supplementary material
Source: PubMed Central journal article supplement (PMC2673322)
Supplement: M901121200_1.pdf [file M901121200_1.pdf]

**Supplementary Table 1 List of qPCR primers used in this study.**

| <b>Gene</b>               | <b>Forward Primer (5' - 3')</b> | <b>Reverse Primer (5' - 3')</b> |
|---------------------------|---------------------------------|---------------------------------|
| <i>Gapdh</i>              | AAACCCATCACCATCTTCCA            | GTGGTTCACACCCATCACAA            |
| <i>c-fos</i>              | AGAATCCGAAGGGAAAGGAA            | ATTGAGAAGAGGCAGGGTGA            |
| <i>Nur77</i>              | GGCATGGTGAAGGAAGTTGT            | AAAGGCGGACTCTAGCAACA            |
| <i>Nor1</i>               | CCCCTCTATCCTTCCTCCAG            | TCTGCAAGGTTTCTGGCTTT            |
| <i>Egr1</i>               | TGCACCCACCTTTCCTACTC            | AGGTCTCCCTGTTGTTGTGG            |
| <i>Egr2</i>               | CTGGAGATGGCATGATCAACA           | GGGAGCGAAGCTACTCGGATA           |
| <i>Arc</i>                | TGAGACCAGTTCCTACTGCTG           | CTCCAGGGTCTCCCTAGTCC            |
| Human <i>c-fos</i>        | CAAGCGGAGACAGACCAACT            | AGTCAGATCAAGGGAAGCCA            |
| Human<br>$\alpha$ -globin | TGGACAAGTTCCTGGCTTCT            | CCGCCCACTCAGACTTTATT            |

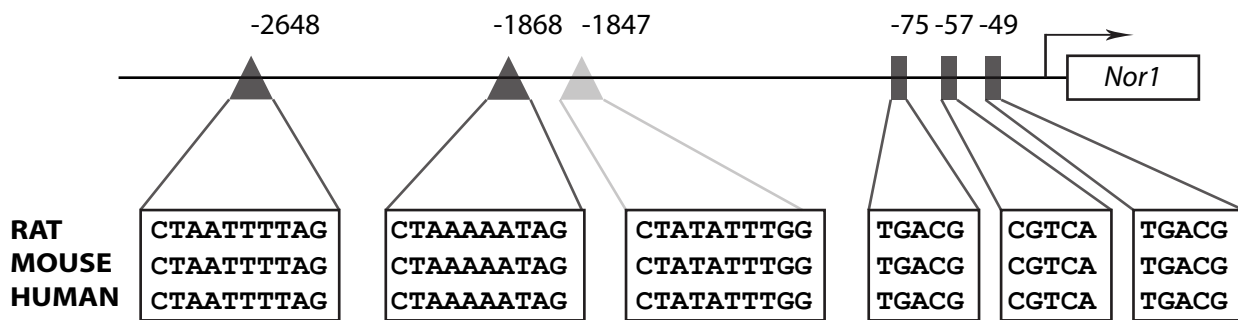

### Supplementary Figure 1 The organisation of the rat *Nor1* promoter.

The *Nor1* promoter consists of 3 half CRE sites at -49, -57, -75 bp upstream of the transcription start site (TSS). There are 2 putative MREs at positions -1868 and -2648 that are conserved in the rat, mouse and human genes. A conserved MRE-like sequence CTATATTTGG was also found at -1847 bp upstream of the TSS. Sequences of 5000 bp upstream and 200 bp downstream of the TSS of the *Nor1* gene from *Rattus Norvegicus* (accession no.: NC\_005104.2), *Mus Musculus* (accession no.: NC000070.4) and *Homo Sapiens* (accession no.: NC\_000009.10) were retrieved from Genbank and aligned using Clustalw (available from EMBL-European Bioinformatics Institute, <http://www.ebi.ac.uk>). The sequences were scanned for the presence of CREs using the consensus sequence for a full CRE TGACGTCA or half CREs TGACG and CGTCA. The MRE consensus sequence CTAWWWWTAR was used to search for putative MEF2 binding sites.
